# Supplementary material for: Deformity Correction with Interbody Fusion Using Lateral versus Posterior Approach in Adult Degenerative Scoliosis: A Systematic Review and Observational Meta-analysis
Source: PubMed Central journal article supplement — Asian Spine J. 2023 Jan 16;17(2):431–51. doi: 10.31616/asj.2022.0040 (PMC10151641; doi:10.31616/asj.2022.0040), 2023-01-16
Supplement: asj-2022-0040-Supplementary-1.pdf [file asj-2022-0040-Supplementary-1.pdf]

**Supplement 1.** Literature search strings

| Type of search strings                                | Search string variables                                      |
|-------------------------------------------------------|--------------------------------------------------------------|
| Medical subject headings [MeSH]                       | "Spinal Fusion" [MeSH]                                       |
|                                                       | "Osteoarthritis, Spine" [MeSH]                               |
|                                                       | "Lumbar Vertebrae" [MeSH]                                    |
|                                                       | "Scoliosis" [MeSH]                                           |
|                                                       | "Decompression, Surgical" [MeSH]                             |
| Non-MeSH/free text words [TW]                         | "Minimally Invasive Surgical Procedures" [MeSH]              |
|                                                       | "Degenerative lumbar scoliosis" [TW]                         |
|                                                       | "Degenerative scoliosis" [TW]                                |
|                                                       | "Adult scoliosis" [TW]                                       |
|                                                       | "de novo scoliosis" [TW]                                     |
|                                                       | "Interbody fusion" [TW]                                      |
|                                                       | "Transforaminal Lumbar Interbody Fusion" [TW] OR "TLIF" [TW] |
|                                                       | "Oblique Lumbar Interbody Fusion" [TW] OR "OLIF" [TW]        |
|                                                       | "Lateral Lumbar Interbody Fusion" [TW] OR "LLIF" [TW]        |
|                                                       | "eXtreme Lateral Interbody Fusion" [TW] OR "XLIF" [TW]       |
| "Direct Lateral Interbody Fusion" [TW] OR "DLIF" [TW] |                                                              |
