# Supplementary material for: Deformity Correction with Interbody Fusion Using Lateral versus Posterior Approach in Adult Degenerative Scoliosis: A Systematic Review and Observational Meta-analysis
Source: PubMed Central journal article supplement — Asian Spine J. 2023 Jan 16;17(2):431–51. doi: 10.31616/asj.2022.0040 (PMC10151641; doi:10.31616/asj.2022.0040), 2023-01-16
Supplement: asj-2022-0040-Supplementary-2.pdf [file asj-2022-0040-Supplementary-2.pdf]

Supplement 2. National Institutes of Health quality assessment of included studies

| Author                | Year | Objective clearly stated? | Eligibility/selection criteria clear? | Participants representative? | All eligible participants enrolled? | Sample size sufficient? | Intervention clearly specified? | Outcome measures clearly defined and assessed consistently? | Blinding in outcome assessment? | Lost to follow-up >20%? | p-values for the pre-to-post changes? | Outcomes assessed multiple times? | Intervention conducted at group level (hospital/community)? | Total |
|-----------------------|------|---------------------------|---------------------------------------|------------------------------|-------------------------------------|-------------------------|---------------------------------|-------------------------------------------------------------|---------------------------------|-------------------------|---------------------------------------|-----------------------------------|-------------------------------------------------------------|-------|
| Katz et al. [23]      | 2019 | 1                         | 1                                     | 1                            | 1                                   | 0.5                     | 1                               | 1                                                           | 0                               | 0.5                     | 1                                     | 1                                 | 1                                                           | 10    |
| Khajavi et al. [19]   | 2014 | 1                         | 0.5                                   | 1                            | 0.5                                 | 0.5                     | 1                               | 1                                                           | 0                               | 0.5                     | 1                                     | 1                                 | 1                                                           | 9.5   |
| Phillips et al. [18]  | 2013 | 1                         | 0.5                                   | 1                            | 0.5                                 | 1                       | 0.5                             | 1                                                           | 0.5                             | 0.5                     | 1                                     | 1                                 | 1                                                           | 9     |
| Kim et al. [21]       | 2018 | 1                         | 1                                     | 1                            | 1                                   | 0.5                     | 1                               | 1                                                           | 0                               | 1                       | 1                                     | 1                                 | 1                                                           | 10.5  |
| Yang et al. [24]      | 2021 | 1                         | 1                                     | 1                            | 1                                   | 0                       | 1                               | 1                                                           | 0                               | 1                       | 1                                     | 1                                 | 1                                                           | 10    |
| Takatori et al. [22]  | 2018 | 1                         | 0.5                                   | 1                            | 1                                   | 0.5                     | 1                               | 1                                                           | 0                               | 1                       | 1                                     | 0.5                               | 1                                                           | 9.5   |
| Beghdadi et al. [20]  | 2014 | 1                         | 1                                     | 1                            | 1                                   | 1                       | 1                               | 1                                                           | 0.5                             | 0.5                     | 1                                     | 0.5                               | 1                                                           | 10.5  |
| Wang et al. [17]      | 2010 | 1                         | 1                                     | 0.5                          | 1                                   | 1                       | 1                               | 1                                                           | 0                               | 1                       | 1                                     | 0.5                               | 1                                                           | 10    |
| Sabou et al. [27]     | 2019 | 1                         | 0.5                                   | 0.5                          | 1                                   | 1                       | 1                               | 0.5                                                         | 0                               | 0.5                     | 1                                     | 1                                 | 1                                                           | 9     |
| Wang et al. [29]      | 2013 | 1                         | 1                                     | 1                            | 1                                   | 1                       | 1                               | 1                                                           | 0.5                             | 1                       | 1                                     | 1                                 | 1                                                           | 11.5  |
| Wu et al. [25]        | 2008 | 1                         | 0.5                                   | 1                            | 1                                   | 1                       | 1                               | 0.5                                                         | 0                               | 0.5                     | 1                                     | 1                                 | 1                                                           | 9.5   |
| Tsai et al. [26]      | 2011 | 1                         | 1                                     | 1                            | 1                                   | 1                       | 1                               | 1                                                           | 0.5                             | 0.5                     | 1                                     | 1                                 | 1                                                           | 11    |
| Zhu et al. [34]       | 2014 | 1                         | 1                                     | 1                            | 1                                   | 1                       | 1                               | 1                                                           | 0.5                             | 0                       | 1                                     | 1                                 | 1                                                           | 10.5  |
| Burmikene et al. [33] | 2012 | 1                         | 1                                     | 1                            | 1                                   | 1                       | 1                               | 0.5                                                         | 0.5                             | 1                       | 1                                     | 0.5                               | 1                                                           | 10.5  |
| Du et al. [30]        | 2017 | 1                         | 1                                     | 1                            | 1                                   | 1                       | 1                               | 1                                                           | 0.5                             | 1                       | 1                                     | 1                                 | 1                                                           | 11.5  |
| Scheufler et al. [28] | 2010 | 1                         | 1                                     | 1                            | 1                                   | 0.5                     | 1                               | 1                                                           | 1                               | 1                       | 1                                     | 1                                 | 1                                                           | 11.5  |
| Zhao et al. [31]      | 2018 | 1                         | 1                                     | 1                            | 1                                   | 0.5                     | 1                               | 1                                                           | 0                               | 1                       | 1                                     | 0.5                               | 1                                                           | 10    |
| Crandall et al. [32]  | 2009 | 1                         | 1                                     | 1                            | 1                                   | 0.5                     | 1                               | 1                                                           | 0.5                             | 1                       | 1                                     | 1                                 | 1                                                           | 11    |
